# Supplementary material for: New Insights into Hop Latent Viroid Detection, Infectivity, Host Range, and Transmission
Source: MDPI journal article supplement (doi:10.3390/v16010030), 2023-12-23
Supplement: s1 [file s1]

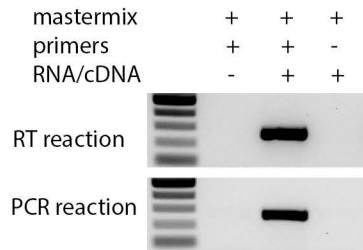

**Figure S1.** Does HLVD sequence secondary structure cause self-priming in RT-PCR analysis? RT-PCR analysis was performed with either RT or PCR reaction mixtures missing the primers. The upper panel shows the amplification within a reaction where primers were taken out from the RT step, while the lower panel shows the reaction amplicons where primers were missing from the PCR step.

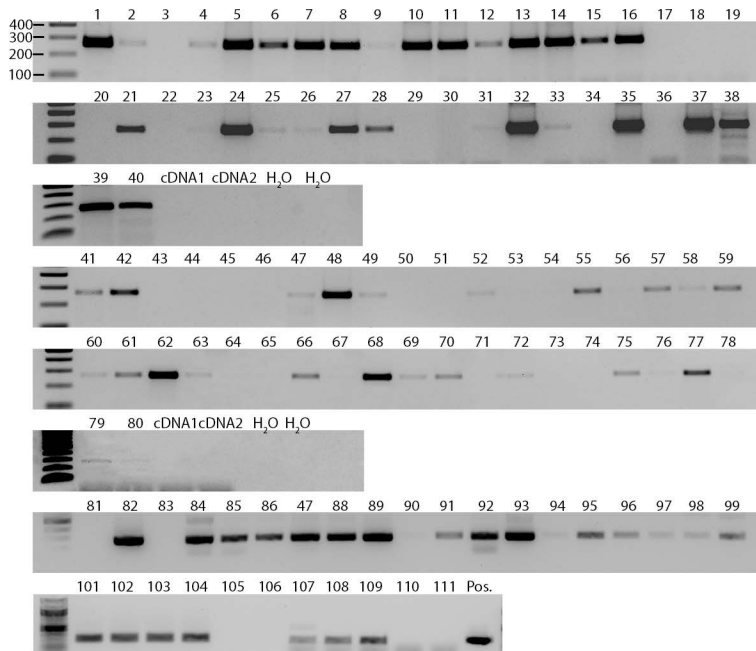

**Figure S2:** RT-PCR analysis of 111 hemp samples to detect HLvD. The sizes of the DNA ladder bands are shown on the left of the top panel. No RNA controls are identified as cDNA controls 1 & 2. No cDNA controls are identified as H<sub>2</sub>O. The cDNA clone of HLvD in pGEM-T Easy vector was the positive control (Pos.)



[illegible]



Genomic track visualization showing sequence conservation, quality, and consensus across a genomic region (positions 10 to 250).

**Sequence:**

1 ATGGTGGCAAGGGCTCGAAGAGGGATCCCCGGGGAAACCTACTCGAGCGAGGCGGAGATCGAGCGCCAGTTCTGTCGCGCGCGACCTGAAAGTTGCTTCGGCTTCTTCTTGTTTCGCGTCTCTGCTGGAACGGCTCCTTCTTACACACGCGCGAGTTGGAAACTACCCGGTGGATACAACCTCTTGAGCGCCGAGCTTAACCTGCAGAAGTTCACATAAAAAAGTGGCCCTCTGGGGAAATACACTACGTGACTTACCTGT

**Conservation:**

Conservation scores are displayed as a bar chart, ranging from 0 to 1.0. The chart shows high conservation across the entire region, with a peak of 1.0 at position 10.

**Quality:**

Quality scores are displayed as a bar chart, ranging from 0 to 10. The chart shows high quality across the entire region, with a peak of 10 at position 10.

**Consensus:**

Consensus sequence: ATGGTGGCAAGGGCTCGAAGAGGGATCCCCGGGGAAACCTACTCGAGCGAGGCGGAGATCGAGCGCCAGTTCTGTCGCGCGCGACCTGAAAGTTGCTTCGGCTTCTTCTTGTTTCGCGTCTCTGCTGGAACGGCTCCTTCTTACACACGCGCGAGTTGGAAACTACCCGGTGGATACAACCTCTTGAGCGCCGAGCTTAACCTGCAGAAGTTCACATAAAAAAGTGGCCCTCTGGGGAAATACACTACGTGACTTACCTGT

**Occupancy:**

Occupancy scores are displayed as a bar chart, ranging from 0 to 1.0. The chart shows high occupancy across the entire region, with a peak of 1.0 at position 10.



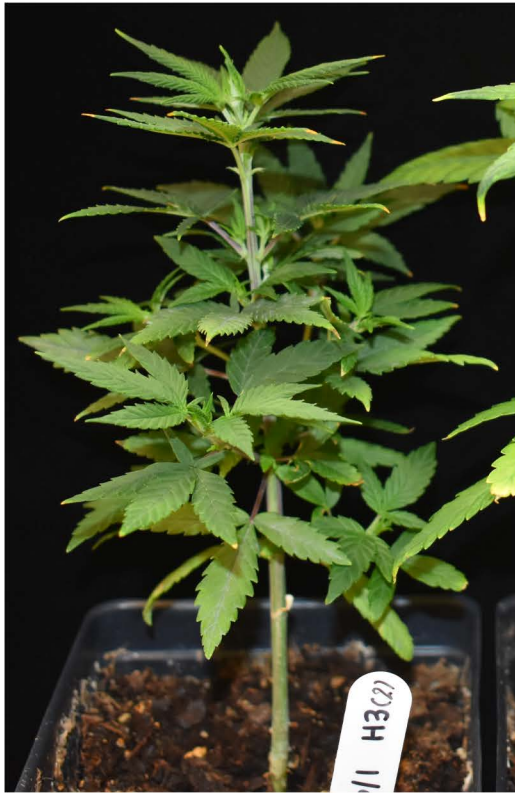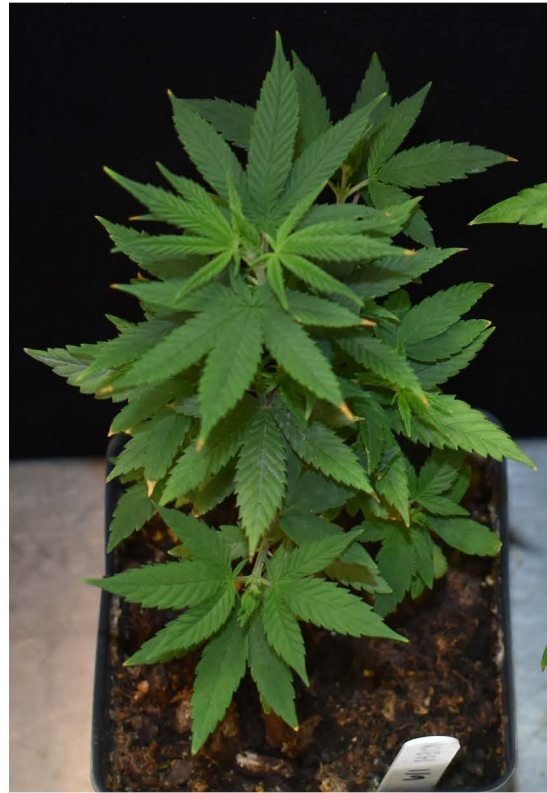

**Figure S4:** Side and slant view of HLVD-infected hemp. Table S1: Accession numbers of Hop latent viroid isolates recovered in this study.

**Table S1.** Accession numbers of *Hop latent viroid* isolates recovered in this study.

| Isolate number | accession number |
|----------------|------------------|
| 01             | OR338705         |
| 05             | OR338706         |
| 06             | OR338707         |
| 07             | OR338708         |
| 08             | OR338709         |
| 10             | OR338710         |
| 11             | OR338711         |
| 12             | OR338712         |
| 13             | OR338713         |
| 14             | OR338714         |
| 21             | OR338715         |
| 24             | OR338716         |
| 25             | OR338717         |
| 26             | OR338718         |
| 27             | OR338719         |
| 28             | OR338720         |
| 32             | OR338721         |
| 33             | OR338722         |
| 35             | OR338723         |
| 37             | OR338724         |
| 38             | OR338725         |
| 39             | OR338726         |
| 40             | OR338727         |
| 42             | OR338728         |
| 47             | OR338729         |
| 48             | OR338730         |
| 55             | OR338731         |
| 58             | OR338732         |
| 59             | OR338733         |
| 61             | OR338734         |
| 62             | OR338735         |
| 66             | OR338736         |
| 68             | OR338737         |
| 69             | OR338738         |
| 70             | OR338739         |
| 72             | OR338740         |
| 75             | OR338741         |
| 77             | OR338742         |
| 79             | OR338743         |
| 80             | OR338744         |
| 81             | OR338745         |
